# Supplementary material for: Preparation of MMT/ Au@Ag SERS substrate for the detection of thiram residues
Source: Research Square preprint supplement (doi:10.21203/rs.3.rs-6518100/v1), 2025-05-09
Supplement: Supplementary file 1 [file f2503e44b394be24b5ed6b65.docx]

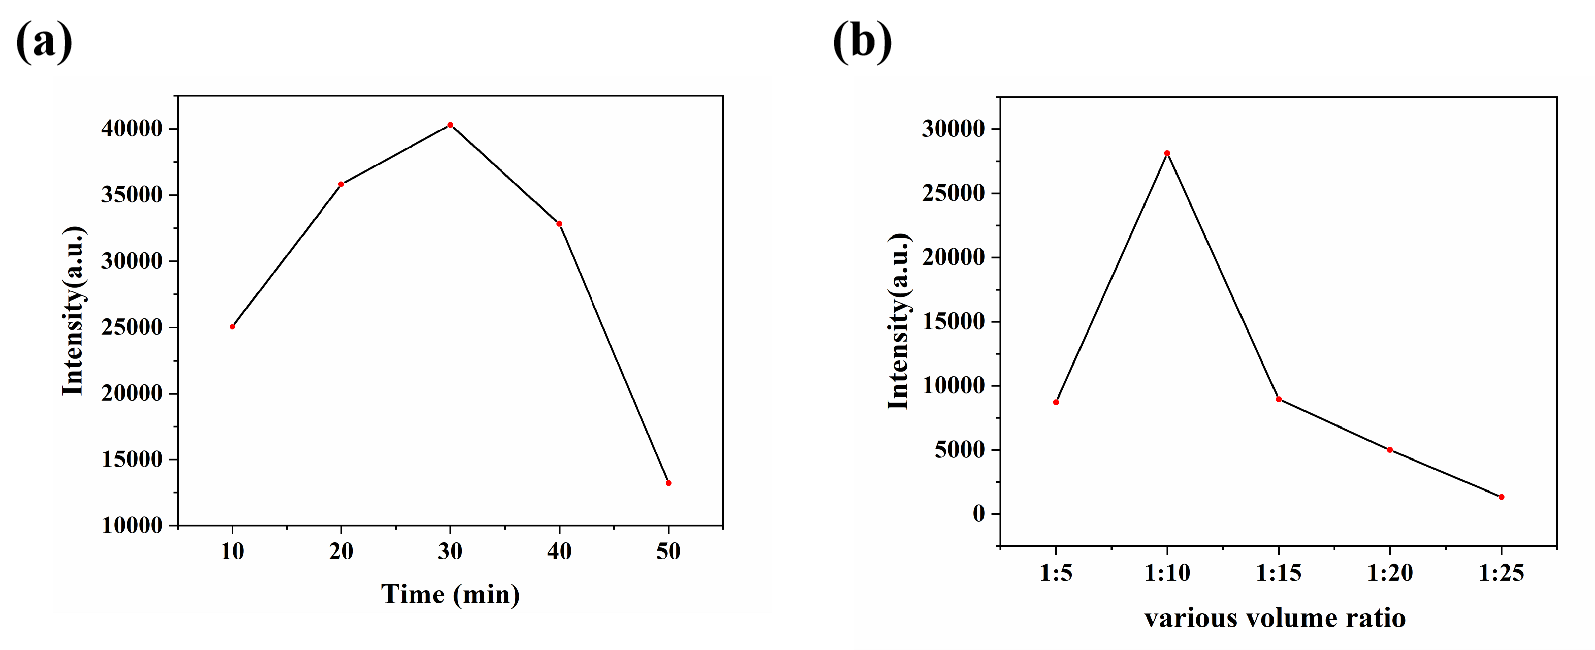
Fig. S1. (a) Optimization of UV irradiation time; (b) Optimization of MMT and Au@Ag core-shell nanoparticles volume ratio


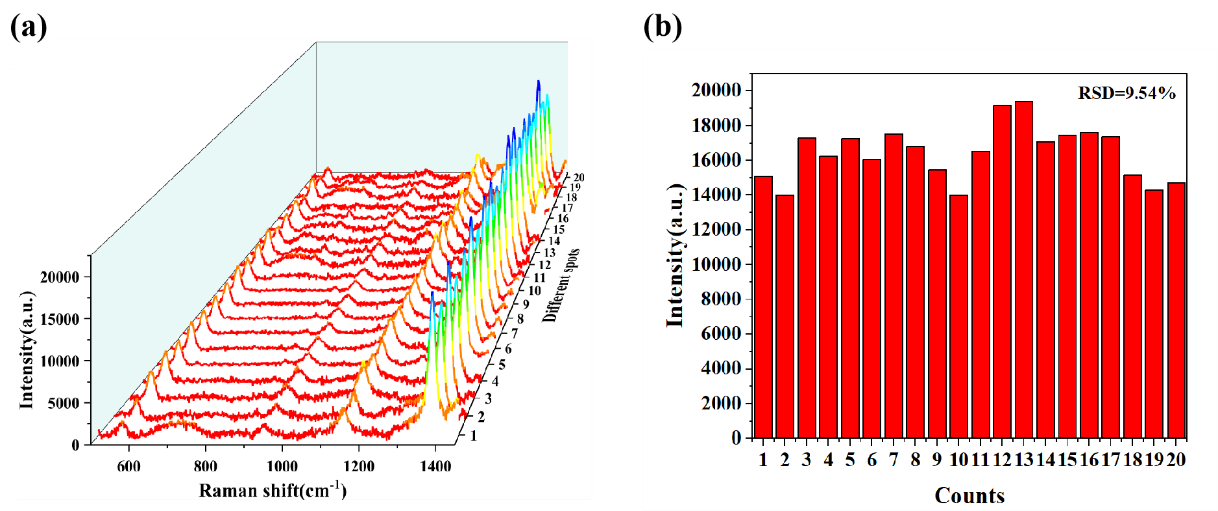


Fig. S2. (a) SERS spectra of TRM from 20 random locations on MMT/Au@Ag core-shell nanoparticles substrates. (b) distribution of the SERS intensity at 1380 cm -1.


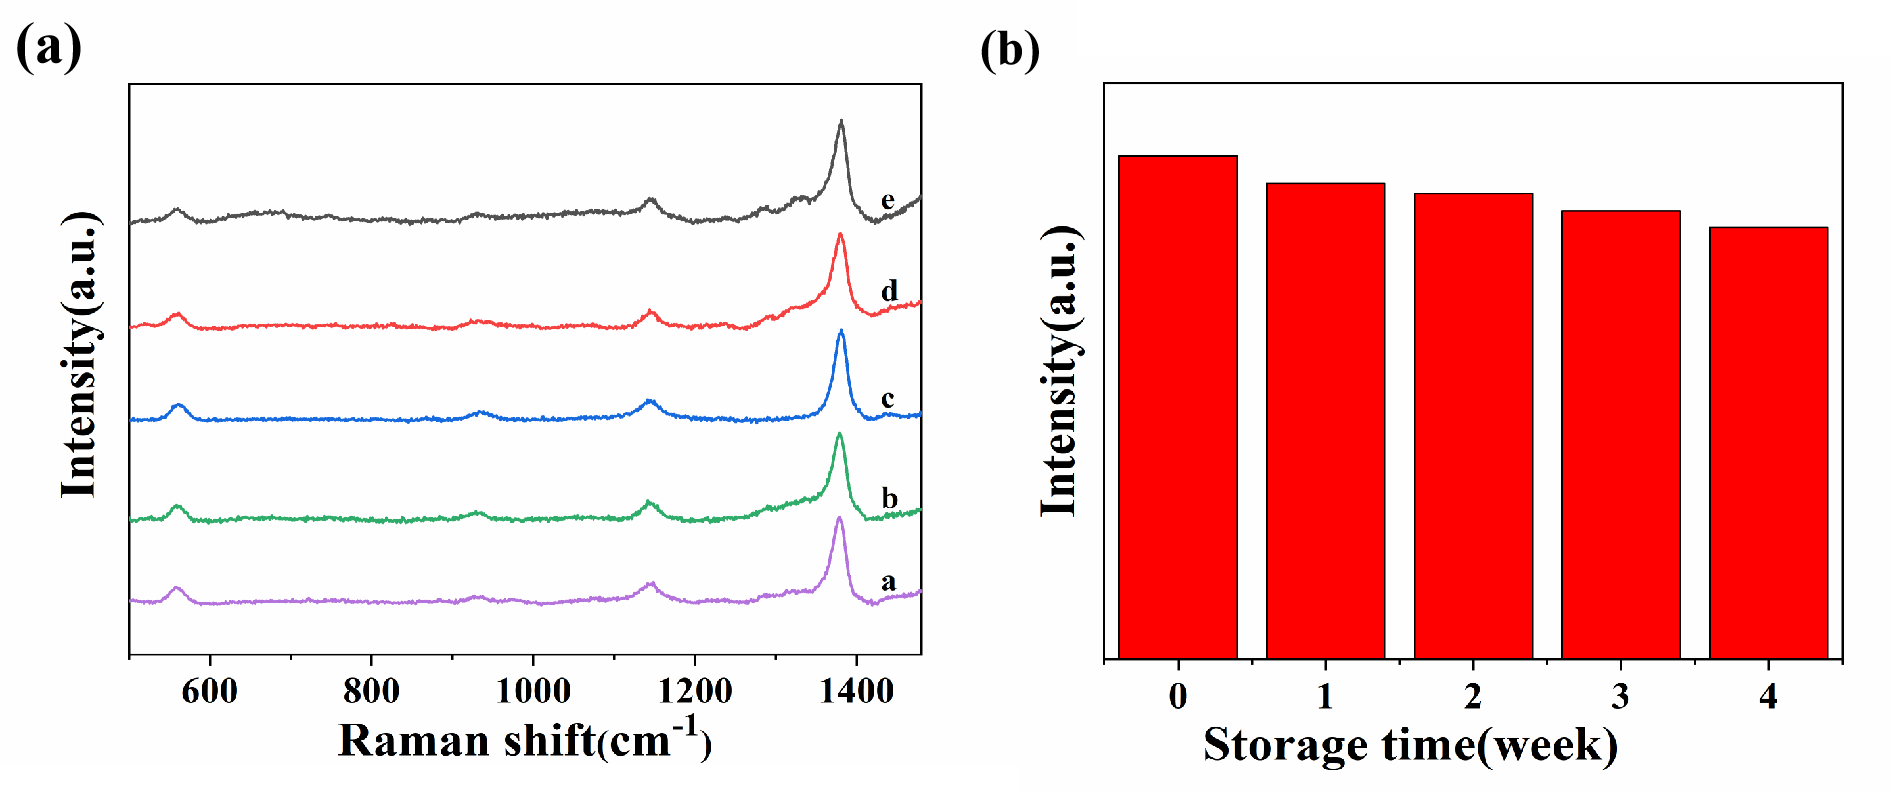


Fig. S3. (a) e-a The Raman spectra of TRM stored for 0-4 weeks; (b) The

bar graph of the change in TRM signal intensity at 1380cm-1.


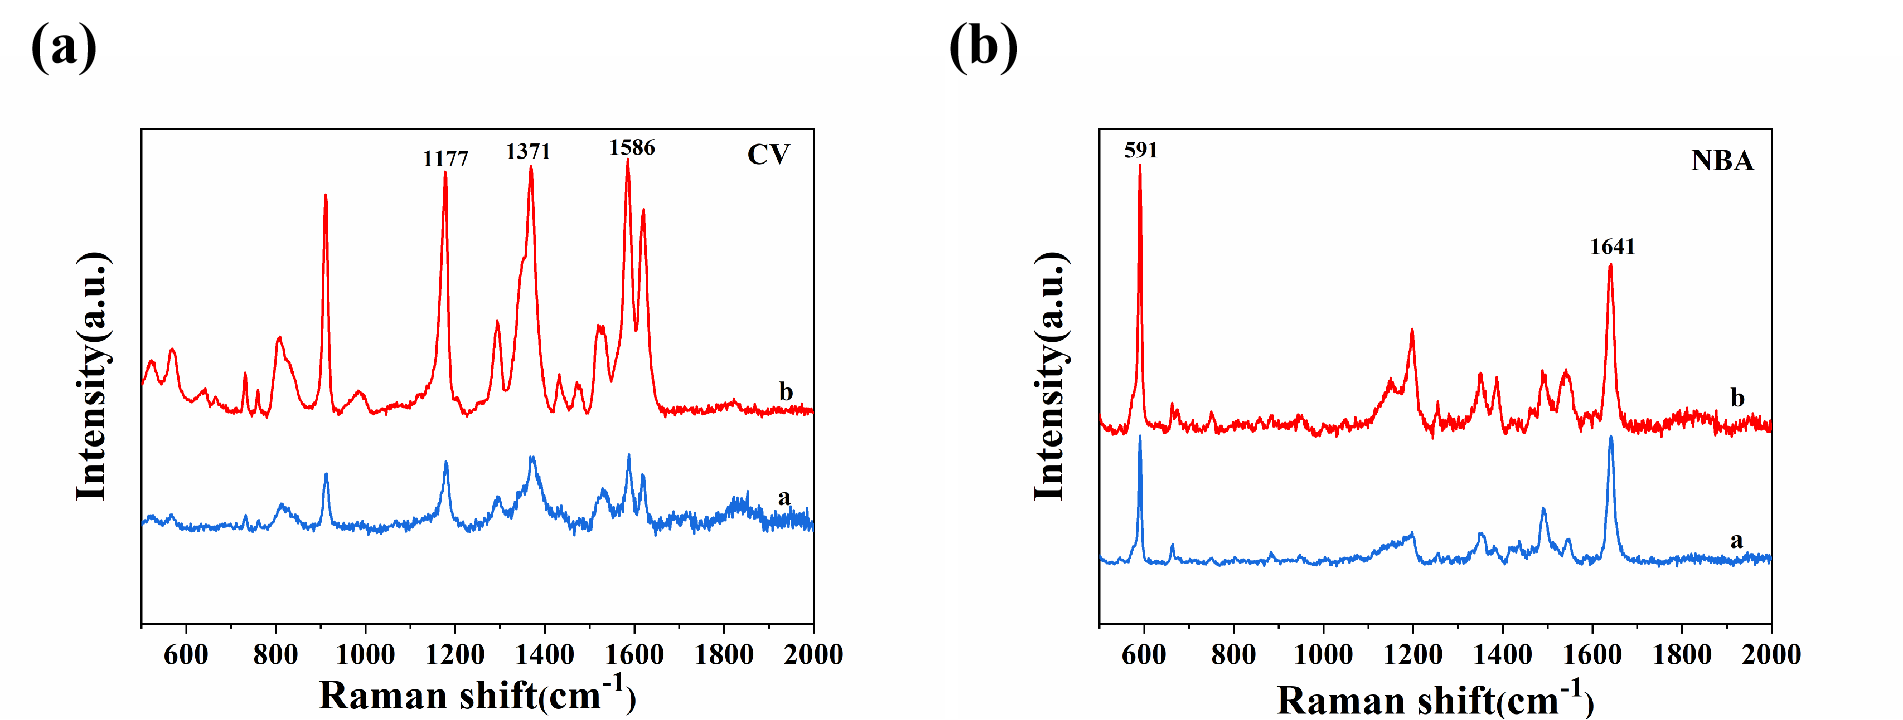


Fig. S4. (a) SERS spectra of CV (10-4 M-10-5 M) (b) SERS spectra of NBA (10-4 M-10-5 M)
